# Supplementary material for: Switching between intermolecular and intramolecular reactions using flow microreactors: lithiation of 2-bromo-2′-silylbiphenyls
Source: Royal Society of Chemistry journal article supplement (doi:10.1039/c6qo00257a), 2016-01-01
Supplement: c6qo00257a1.pdf [file c6qo00257a1.pdf]

## Switching Between Intermolecular and Intramolecular Reactions Using Flow Microreactors. Lithiation of 2-Bromo-2'-Silylbiphenyls

Aiichiro Nagaki, Songhee Kim, Nobuyuki Miuchi, Hiroki Yamashita, Katsuyuki Hirose, and Jun-ichi Yoshida

### General

GC analysis was performed on a SHIMADZU GC-2014 gas chromatograph equipped with a flame ionization detector using a fused silica capillary column (column, CBPI; 0.25 mm x 25 m).  $^1\text{H}$  and  $^{13}\text{C}$  NMR spectra were recorded on Varian MERCURY plus-400 ( $^1\text{H}$  400 MHz,  $^{13}\text{C}$  100 MHz) spectrometer with  $\text{Me}_4\text{Si}$  or  $\text{CHCl}_3$  as a standard in  $\text{CDCl}_3$  unless otherwise noted. EI mass spectra was recorded on JMS-SX102A spectrometer. Gel permeation chromatography was carried out with Japan Analytical Industry LC-9201 equipped with JAIGEL-1H and 2H using  $\text{CHCl}_3$  as eluent.

THF and  $\text{Et}_2\text{O}$  were purchased from Kanto Chemical Co., Inc. as a dry solvent and used without further purification. Hexane was purchased from Wako, distilled before use, and stored over molecular sieves 4A. Methanol, *n*-BuLi, methyl trifluoromethanesulfonate, isopropoxy boronic acid pinacol ester, 2,2'-dibromobenzene, chlorotrimethylsilane, chlorodimethylphenylsilane, and chlorodiphenylmethylsilane were commercially available. Stainless steel (SUS304) T-shaped micromixer with inner diameter of 250 and 500  $\mu\text{m}$  was manufactured by Sanko Seiki Co., Inc. Stainless steel (SUS316) microtube reactors with inner diameter of 1000  $\mu\text{m}$  were purchased from GL Sciences and were cut into appropriate lengths (3.5, 12.5, 25, 50, 100, and 200 cm). The micromixers and the microtube reactors were connected with stainless steel fittings (GL Sciences, 1/16 OUN) to construct the integrated flow microreactor system in the laboratory. The flow microreactor system was dipped in a cooling bath to control the temperature. Solutions were continuously introduced to the flow microreactor system using syringe pumps, Harvard Model 11 Plus or Harvard PHD 2000, equipped with gastight syringes purchased from SGE. After a steady state was reached, the product solution was collected for 30 s. When the collection time was longer, the product solution can be obtained in a preparative scale.

### Synthesis of 2-Bromo-2'-(trimethylsilyl)biphenyl

To a solution of 2,2'-dibromobiphenyl (21 g (67 mmol)) in THF (300 mL) at  $-78\text{ }^\circ\text{C}$  was added dropwise a 1.64 M solution of *n*-BuLi in hexane (47 mL (77 mmol)). The resulting solution was stirred for 15 min and chlorotrimethylsilane (11 g (101 mmol)) was added dropwise. The mixture was warmed to room temperature, saturated *aq* $\text{NH}_4\text{Cl}$  was added, and the mixture was extracted with diethyl ether. The organic fractions were combined, washed (brine), dried ( $\text{Na}_2\text{SO}_4$ ), concentrated under reduced pressure and the crude product was purified by using column chromatography (hexane) to give the pure product of 2-bromo-2'-(trimethylsilyl)biphenyl (69%). The spectral data were identical to those reported in the literature.<sup>1</sup>

### Synthesis of 2-Bromo-2'-(dimethylphenylsilyl)biphenyl

To a solution of 2,2'-dibromobiphenyl (21 g (67 mmol)) in THF (300 mL) at  $-78\text{ }^\circ\text{C}$  was added dropwise a 1.64 M solution of *n*-BuLi in hexane (47 mL (77 mmol)). The resulting solution was stirred for 15 min and chlorodimethylphenylsilane (17 g (100 mmol)) was added dropwise. The mixture was warmed to room temperature, saturated *aq* $\text{NH}_4\text{Cl}$  was added, and the mixture was extracted with diethyl ether. The organic fractions were combined, washed (brine), dried ( $\text{Na}_2\text{SO}_4$ ), concentrated under reduced pressure and the crude product was purified by using column chromatography (hexane only) to give the pure product of 2-bromo-2'-(dimethylphenylsilyl)biphenyl (65%). The

spectral data were identical to those reported in the literature.<sup>1</sup>

### Synthesis of 2-Bromo-2'-(diphenylmethylsilyl)biphenyl

To a solution of 2,2'-dibromobiphenyl (21 g (67 mmol)) in THF (300 mL) at -78 °C was added dropwise a 1.64 M solution of *n*-BuLi in hexane (47 mL (77 mmol)). The resulting solution was stirred for 15 min and chlorodiphenylmethylsilane (20 g (86 mmol)) was added dropwise. The mixture was warmed to room temperature, saturated *aq* NH<sub>4</sub>Cl was added, and the mixture was extracted with diethyl ether. The organic fractions were combined, washed (brine), dried (Na<sub>2</sub>SO<sub>4</sub>), concentrated under reduced pressure and the crude product was purified by using column chromatography (hexane only) to give the pure product of 2-bromo-2'-(diphenylmethylsilyl)biphenyl (39%).

**2-Bromo-2'-(diphenylmethylsilyl)biphenyl:** a white solid, GC *t*<sub>R</sub> 32.3 min; <sup>1</sup>H NMR (400 MHz, CDCl<sub>3</sub>) δ 0.19 (s, 3H), 6.78 (dd, 1H, *J* = 1.6, 1.6 Hz), 6.96 (ddd, 1H, *J* = 7.6, 7.6, 1.2 Hz), 7.09 (ddd, 1H, *J* = 7.6, 7.6, 2.0 Hz), 7.21 (d, 1H, *J* = 8.0 Hz), 7.28-7.47 (m, 13H), 7.52 (dd, 1H, *J* = 1.2, 1.2 Hz) ppm; <sup>13</sup>C NMR (100 MHz, CDCl<sub>3</sub>) δ -3.5, 124.2, 126.4, 126.7, 127.7 (d, *J* = 2.0 Hz), 128.9 (d, *J* = 6.3 Hz), 129.0 (d, *J* = 3.6 Hz), 130.2, 131.6, 132.2, 134.6, 135.0, 135.2, 136.9, 137.3 (d, *J* = 4.3 Hz), 143.6, 148.2 ppm; HRMS (DART) *m/z* calcd for C<sub>25</sub>H<sub>20</sub>BrSi (M<sup>+</sup>-H): 427.0512, found: 427.0526.

### The Br-Li Exchange Reaction of 2-Bromo-2'-(trimethylsilyl)biphenyl Followed by Reaction with Methanol in a macro batchreactor.

A solution of *n*-BuLi (0.44 M in *n*-hexane, 2.5 mL) was added dropwise to a solution of 2-bromo-2'-(trimethylsilyl)biphenyl (0.10 M in THF, 10 mL) in a 50 mL round bottom glass flask with magnetic stirring for 1.0 min under argon. The mixture was stirred for 7 min, and a solution of methanol (5.0 mL) was added. After being stirring for 7 min, the mixture was warmed to room temperature by removing the cooling bath, and then was poured into *sat. aq.* NH<sub>4</sub>Cl. The reaction mixture was analyzed by GC. The results are summarized in Figure S-1.

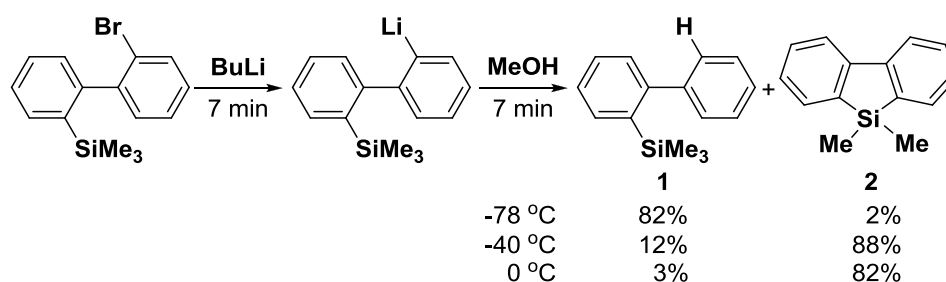

**Figure S-1.** Br-Li Exchange of 2-bromo-2'-(trimethylsilyl)biphenyl with *n*-BuLi followed by reaction with methanol in a macro batch reactor.

**2-(Trimethylsilyl)biphenyl (1):** The crude product at -78 °C was purified by flash chromatography (hexane only) to obtain 2-(trimethylsilyl)biphenyl. The analytical data were identical to those reported in the literature.<sup>1</sup>

**9,9-Dimethyl-9-silafluorene (2):** The crude product at 0 °C was purified by flash chromatography (hexane only) to obtain 2-(trimethylsilyl)biphenyl. The analytical data were identical to those reported in the literature.<sup>1</sup>

## Typical Procedure for the Br-Li Exchange Reaction of 2-Bromo-2'-(trimethylsilyl)biphenyl Followed by Reaction with Methanol in Flow Microreactor Systems

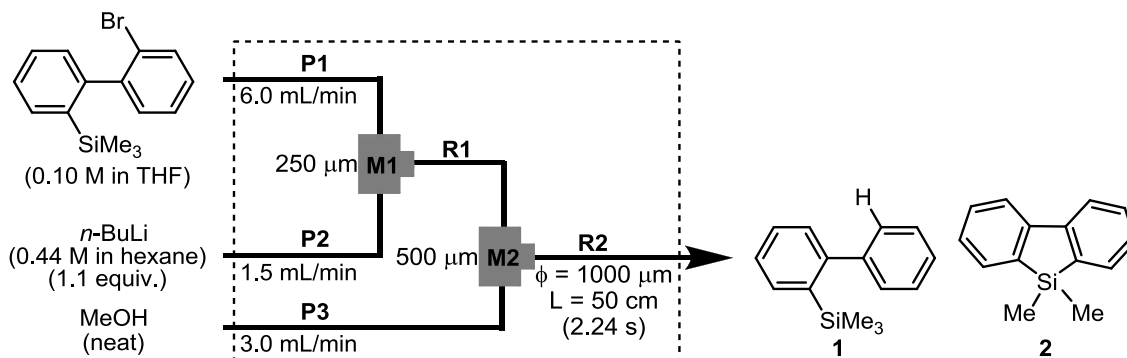

A flow microreactor system consisting of two T-shaped micromixers (**M1** and **M2**), two microtube reactors (**R1** and **R2**) and three tube pre-cooling units (**P1** ( $\phi = 1000 \mu\text{m}$ , length  $L = 100 \text{ cm}$ ), **P2** ( $\phi = 1000 \mu\text{m}$ ,  $L = 50 \text{ cm}$ ) and **P3** ( $\phi = 1000 \mu\text{m}$ ,  $L = 100 \text{ cm}$ )) was used. A solution of 2-bromo-2'-(trimethylsilyl)biphenyl (0.10 M in THF) (flow rate:  $6.0 \text{ mL min}^{-1}$ ) and a solution of *n*-BuLi (0.44 M in *n*-hexane) (flow rate:  $1.5 \text{ mL min}^{-1}$ ) were introduced to **M1** ( $\phi = 250 \mu\text{m}$ ) by syringe pumps. The resulting solution was passed through **R1** and was mixed with a solution of methanol (flow rate:  $3.0 \text{ mL min}^{-1}$ ) in **M2** ( $\phi = 500 \mu\text{m}$ ). The resulting solution was passed through **R2** ( $\phi = 1000 \mu\text{m}$ ,  $L = 50 \text{ cm}$ ). After a steady state was reached, the product solution was collected for 30 s and was quenched with saturated *aq*NH<sub>4</sub>Cl. The reaction mixture was analyzed by GC. The results are summarized in Table S-1.

**Table S-1.** The Br-Li exchange reaction of 2-bromo-2'-(trimethylsilyl)biphenyl followed by reaction with methanol in the flow microreactor systems

| inner diameter of <b>R1</b> ( $\mu\text{m}$ ) | length of <b>R1</b> (cm) | residence time (s) | temperature ( $^{\circ}\text{C}$ ) | conv. (%) | yield of <b>1</b> (%) | yield of <b>2</b> (%) |
|-----------------------------------------------|--------------------------|--------------------|------------------------------------|-----------|-----------------------|-----------------------|
| 1000                                          | 3.5                      | 0.220              | 20                                 | 98        | 2                     | 93                    |
| 1000                                          | 12.5                     | 0.785              |                                    | 97        | 1                     | 94                    |
| 1000                                          | 25                       | 1.57               |                                    | 100       | 1                     | 93                    |
| 1000                                          | 50                       | 3.14               |                                    | 100       | 1                     | 95                    |
| 1000                                          | 100                      | 6.28               |                                    | 100       | 1                     | 95                    |
| 1000                                          | 200                      | 12.6               |                                    | 100       | 1                     | 95                    |
| 1000                                          | 3.5                      | 0.220              | 0                                  | 98        | 23                    | 74                    |
| 1000                                          | 12.5                     | 0.785              |                                    | 100       | 1                     | 96                    |
| 1000                                          | 25                       | 1.57               |                                    | 100       | 1                     | 95                    |
| 1000                                          | 50                       | 3.14               |                                    | 100       | 1                     | 95                    |
| 1000                                          | 100                      | 6.28               |                                    | 100       | 1                     | 94                    |
| 1000                                          | 200                      | 12.6               |                                    | 100       | 2                     | 97                    |
| 1000                                          | 3.5                      | 0.220              | -20                                | 95        | 87                    | 8                     |
| 1000                                          | 12.5                     | 0.785              |                                    | 100       | 73                    | 26                    |

|      |      |       |     |     |    |    |
|------|------|-------|-----|-----|----|----|
| 1000 | 25   | 1.57  |     | 100 | 53 | 46 |
| 1000 | 50   | 3.14  |     | 100 | 36 | 61 |
| 1000 | 100  | 6.28  |     | 100 | 5  | 91 |
| 1000 | 200  | 12.6  |     | 100 | 3  | 96 |
| 1000 | 3.5  | 0.220 | -40 | 91  | 89 | 2  |
| 1000 | 12.5 | 0.785 |     | 99  | 96 | 3  |
| 1000 | 25   | 1.57  |     | 100 | 96 | 4  |
| 1000 | 50   | 3.14  |     | 100 | 95 | 5  |
| 1000 | 100  | 6.28  |     | 100 | 92 | 8  |
| 1000 | 200  | 12.6  |     | 100 | 85 | 14 |
| 1000 | 3.5  | 0.220 | -60 | 73  | 72 | 1  |
| 1000 | 12.5 | 0.785 |     | 97  | 96 | 1  |
| 1000 | 25   | 1.57  |     | 99  | 98 | 1  |
| 1000 | 50   | 3.14  |     | 100 | 98 | 2  |
| 1000 | 100  | 6.28  |     | 98  | 97 | 1  |
| 1000 | 200  | 12.6  |     | 100 | 98 | 2  |
| 1000 | 3.5  | 0.220 | -78 | 22  | 21 | 1  |
| 1000 | 12.5 | 0.785 |     | 43  | 42 | 1  |
| 1000 | 25   | 1.57  |     | 72  | 71 | 1  |
| 1000 | 50   | 3.14  |     | 89  | 88 | 1  |
| 1000 | 100  | 6.28  |     | 95  | 94 | 1  |
| 1000 | 200  | 12.6  |     | 99  | 98 | 1  |

The reaction with methyl trifluoromethanesulfonate was carried out under the following conditions (temperature: -40 °C, **R1**:  $\phi = 1000 \mu\text{m}$ ,  $L = 12.5 \text{ cm}$  (0.79 s)) to obtain 2-methyl-2'-(trimethylsilyl)biphenyl in 94% yield (determined by GC). After extraction, the crude product was purified by using column chromatography (hexane). The spectral data were identical to those reported in the literature.<sup>2</sup>

The reaction with isopropyl pinacol borate was carried out under the following conditions (temperature: -40 °C, **R1**:  $\phi = 1000 \mu\text{m}$ ,  $L = 12.5 \text{ cm}$  (0.79 s)) to obtain 4,4,5,5-tetramethyl-2-[2'-(trimethylsilyl)[1,1'-biphenyl]-2-yl]-1,3,2-dioxaborolane in 81% yield (determined by GC). After extraction, the crude product was purified by using column chromatography (Hexane : AcOEt = 20 : 1). <sup>1</sup>H NMR (400 MHz, CDCl<sub>3</sub>)  $\delta$  -0.06 (s, 9H), 1.05 (d, 12H,  $J = 12.4 \text{ Hz}$ ), 7.09-7.11 (m, 1H), 7.20-7.41 (m, 5H), 7.52-7.54 (m, 1H), 7.70 (dd, 1H,  $J = 7.2, 1.6 \text{ Hz}$ ) ppm; <sup>13</sup>C NMR (100 MHz, CDCl<sub>3</sub>)  $\delta$  0.4, 24.4, 24.6, 83.2, 125.7, 126.3, 127.3, 129.1, 129.7, 129.8, 133.6, 133.7, 138.2, 149.6, 149.8 ppm; HRMS (ESI)  $m/z$  calcd for C<sub>21</sub>H<sub>29</sub>B<sub>1</sub>O<sub>2</sub>Si<sub>1</sub>Na ([M+Na]<sup>+</sup>): 375.1922, found: 375.1923.

#### Typical Procedure for the Br-Li Exchange Reaction of 2-Bromo-2'-(dimethylphenylsilyl)biphenyl Followed by Reaction with Methanol in Flow Microreactor Systems

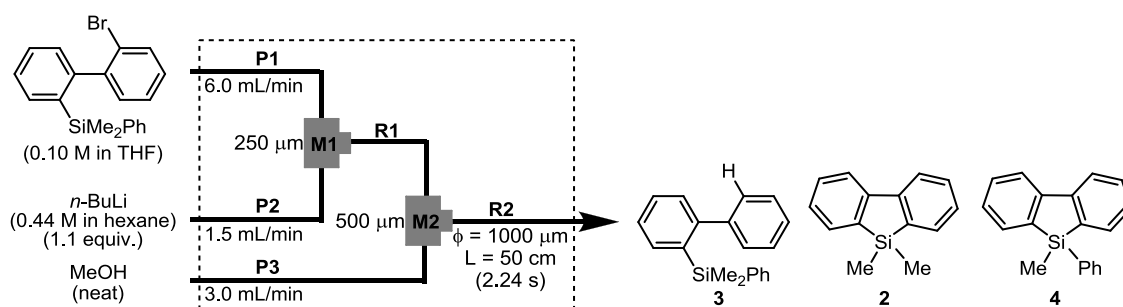

A flow microreactor system consisting of two T-shaped micromixers (**M1** and **M2**), two microtube reactors (**R1** and **R2**) and three tube pre-cooling units (**P1** ( $\phi = 1000 \mu\text{m}$ , length  $L = 100 \text{ cm}$ ), **P2** ( $\phi = 1000 \mu\text{m}$ ,  $L = 50 \text{ cm}$ ) and **P3** ( $\phi = 1000 \mu\text{m}$ ,  $L = 100 \text{ cm}$ )) was used. A solution of 2-bromo-2'-(dimethylphenylsilyl)biphenyl (0.10 M in THF) (flow rate:  $6.0 \text{ mL min}^{-1}$ ) and a solution of  $n\text{-BuLi}$  (0.44 M in  $n\text{-hexane}$ ) (flow rate:  $1.5 \text{ mL min}^{-1}$ ) were introduced to **M1** ( $\phi = 250 \mu\text{m}$ ) by syringe pumps. The resulting solution was passed through **R1** and was mixed with a solution of methanol (flow rate:  $3.0 \text{ mL min}^{-1}$ ) in **M2** ( $\phi = 500 \mu\text{m}$ ). The resulting solution was passed through **R2** ( $\phi = 1000 \mu\text{m}$ ,  $L = 50 \text{ cm}$ ). After a steady state was reached, the product solution was collected for 30 s and was quenched with saturated  $aq\text{NH}_4\text{Cl}$ . The reaction mixture was analyzed by GC. The results are summarized in Table S-2.

**Table S-2.** The Br-Li exchange reaction of 2-bromo-2'-(dimethylphenylsilyl)biphenyl followed by reaction with methanol in flow microreactor systems

| inner diameter of <b>R1</b> ( $\mu\text{m}$ ) | length of <b>R1</b> (cm) | residence time (s) | temperature ( $^{\circ}\text{C}$ ) | conv. (%) | yield of <b>3</b> (%) | yield of <b>2</b> (%) | yield of <b>4</b> (%) |
|-----------------------------------------------|--------------------------|--------------------|------------------------------------|-----------|-----------------------|-----------------------|-----------------------|
| 1000                                          | 3.5                      | 0.220              | 20                                 | 98        | 1                     | 84                    | 13                    |
| 1000                                          | 12.5                     | 0.785              |                                    | 100       | 1                     | 84                    | 10                    |
| 1000                                          | 25                       | 1.57               |                                    | 100       | 1                     | 85                    | 9                     |
| 1000                                          | 50                       | 3.14               |                                    | 100       | 2                     | 84                    | 6                     |
| 1000                                          | 100                      | 6.28               |                                    | 100       | 2                     | 87                    | 5                     |
| 1000                                          | 200                      | 12.6               |                                    | 100       | 1                     | 92                    | 5                     |
| 1000                                          | 3.5                      | 0.220              | 0                                  | 100       | 2                     | 86                    | 9                     |
| 1000                                          | 12.5                     | 0.785              |                                    | 100       | 1                     | 87                    | 9                     |
| 1000                                          | 25                       | 1.57               |                                    | 99        | 1                     | 86                    | 8                     |
| 1000                                          | 50                       | 3.14               |                                    | 100       | 2                     | 86                    | 7                     |
| 1000                                          | 100                      | 6.28               |                                    | 100       | 2                     | 87                    | 5                     |
| 1000                                          | 200                      | 12.6               |                                    | 100       | 1                     | 92                    | 5                     |
| 1000                                          | 3.5                      | 0.220              | -20                                | 99        | 71                    | 26                    | 2                     |
| 1000                                          | 12.5                     | 0.785              |                                    | 100       | 31                    | 65                    | 4                     |
| 1000                                          | 25                       | 1.57               |                                    | 100       | 9                     | 83                    | 5                     |
| 1000                                          | 50                       | 3.14               |                                    | 100       | 2                     | 90                    | 5                     |
| 1000                                          | 100                      | 6.28               |                                    | 100       | 2                     | 90                    | 4                     |
| 1000                                          | 200                      | 12.6               |                                    | 100       | 2                     | 93                    | 4                     |

|       |      |       |     |     |    |    |   |
|-------|------|-------|-----|-----|----|----|---|
| 1000  | 3.5  | 0.220 | -40 | 97  | 94 | 3  | 0 |
| 1000  | 12.5 | 0.785 |     | 100 | 93 | 7  | 0 |
| 1000  | 25   | 1.57  |     | 100 | 90 | 10 | 0 |
| 1000  | 50   | 3.14  |     | 100 | 83 | 16 | 1 |
| 1000  | 100  | 6.28  |     | 100 | 69 | 30 | 1 |
| 1000  | 200  | 12.6  |     | 100 | 48 | 51 | 1 |
| <hr/> |      |       |     |     |    |    |   |
| 1000  | 3.5  | 0.220 | -60 | 81  | 79 | 2  | 0 |
| 1000  | 12.5 | 0.785 |     | 96  | 94 | 2  | 0 |
| 1000  | 25   | 1.57  |     | 99  | 97 | 2  | 0 |
| 1000  | 50   | 3.14  |     | 100 | 97 | 3  | 0 |
| 1000  | 100  | 6.28  |     | 100 | 96 | 4  | 0 |
| 1000  | 200  | 12.6  |     | 99  | 95 | 4  | 0 |
| <hr/> |      |       |     |     |    |    |   |
| 1000  | 3.5  | 0.220 | -78 | 2   | 2  | 0  | 0 |
| 1000  | 12.5 | 0.785 |     | 35  | 35 | 0  | 0 |
| 1000  | 25   | 1.57  |     | 63  | 63 | 0  | 0 |
| 1000  | 50   | 3.14  |     | 85  | 85 | 0  | 0 |
| 1000  | 100  | 6.28  |     | 92  | 91 | 1  | 0 |
| 1000  | 200  | 12.6  |     | 97  | 95 | 2  | 0 |

**2-(Dimethylphenylsilyl)biphenyl (3):** The crude product was purified by flash chromatography (hexane) to obtain 2-(dimethylphenylsilyl)biphenyl. The analytical data were identical to those reported in the literature.<sup>3</sup>

**9-Methyl-9-phenyl-9-silafluorene (4):** The crude product was purified by using flash chromatography (hexane) to obtain 9-methyl-9-phenyl-9-silafluorene. The spectral data were identical to those reported in the literature.<sup>1</sup>

### Typical Procedure for the Br-Li Exchange Reaction of 2-Bromo-2'-(methyl-diphenylsilyl)biphenyl Followed by Reaction with Methanol in Flow Microreactor Systems

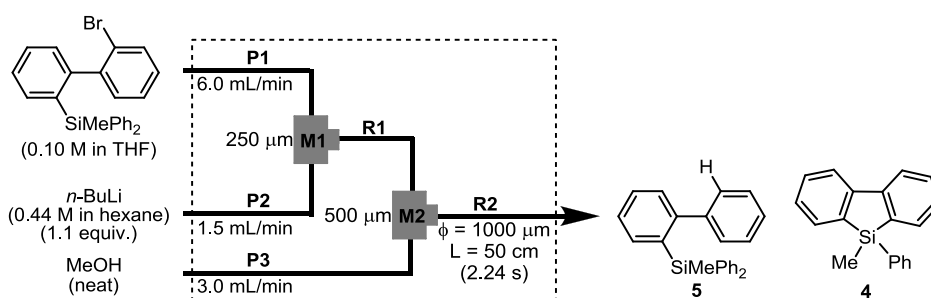

A flow microreactor system consisting of two T-shaped micromixers (**M1** and **M2**), two microtube reactors (**R1** and **R2**) and three tube pre-cooling units (**P1** ( $\phi = 1000 \mu\text{m}$ , length  $L = 100 \text{ cm}$ ), **P2** ( $\phi = 1000 \mu\text{m}$ ,  $L = 50 \text{ cm}$ ) and **P3** ( $\phi = 1000 \mu\text{m}$ ,  $L = 100 \text{ cm}$ )) was used. A solution of 2-bromo-2'-(methyl-diphenylsilyl)biphenyl (0.10 M in THF) (flow rate:  $6.0 \text{ mL min}^{-1}$ ) and a solution of *n*-BuLi (0.44 M in *n*-hexane) (flow rate:  $1.5 \text{ mL min}^{-1}$ ) were introduced to **M1** ( $\phi = 250 \mu\text{m}$ ) by syringe pumps. The resulting

solution was passed through **R1** and was mixed with a solution of methanol (flow rate: 3.0 mL min<sup>-1</sup>) in **M2** ( $\phi = 500 \mu\text{m}$ ). The resulting solution was passed through **R2** ( $\phi = 1000 \mu\text{m}$ ,  $L = 50 \text{ cm}$ ). After a steady state was reached, the product solution was collected for 30 s and was quenched with saturated aqNH<sub>4</sub>Cl. The reaction mixture was analyzed by GC. The results are summarized in Table S-3.

**Table S-3.** The Br-Li exchange reaction of 2-bromo-2'-(methyldiphenylsilyl)biphenyl followed by reaction with methanol in flow microreactor systems

| inner diameter of <b>R1</b> ( $\mu\text{m}$ ) | length of <b>R1</b> (cm) | residence time (s) | temperature ( $^{\circ}\text{C}$ ) | conv. (%) | yield of <b>5</b> (%) | yield of <b>4</b> (%) |
|-----------------------------------------------|--------------------------|--------------------|------------------------------------|-----------|-----------------------|-----------------------|
| 1000                                          | 3.5                      | 0.220              | 20                                 | 100       | 17                    | 83                    |
| 1000                                          | 12.5                     | 0.785              |                                    | 99        | 3                     | 96                    |
| 1000                                          | 25                       | 1.57               |                                    | 100       | 2                     | 90                    |
| 1000                                          | 50                       | 3.14               |                                    | 99        | 3                     | 96                    |
| 1000                                          | 100                      | 6.28               |                                    | 100       | 2                     | 90                    |
| 1000                                          | 200                      | 12.6               |                                    | 100       | 2                     | 87                    |
| 1000                                          | 3.5                      | 0.220              | 0                                  | 100       | 85                    | 15                    |
| 1000                                          | 12.5                     | 0.785              |                                    | 99        | 62                    | 37                    |
| 1000                                          | 25                       | 1.57               |                                    | 100       | 34                    | 63                    |
| 1000                                          | 50                       | 3.14               |                                    | 99        | 18                    | 81                    |
| 1000                                          | 100                      | 6.28               |                                    | 100       | 6                     | 88                    |
| 1000                                          | 200                      | 12.6               |                                    | 100       | 4                     | 87                    |
| 1000                                          | 3.5                      | 0.220              | -20                                | 100       | 98                    | 2                     |
| 1000                                          | 12.5                     | 0.785              |                                    | 100       | 98                    | 2                     |
| 1000                                          | 25                       | 1.57               |                                    | 99        | 95                    | 4                     |
| 1000                                          | 50                       | 3.14               |                                    | 100       | 94                    | 6                     |
| 1000                                          | 100                      | 6.28               |                                    | 100       | 91                    | 9                     |
| 1000                                          | 200                      | 12.6               |                                    | 100       | 85                    | 15                    |
| 1000                                          | 3.5                      | 0.220              | -40                                | 97        | 96                    | 1                     |
| 1000                                          | 12.5                     | 0.785              |                                    | 100       | 100                   | 0                     |
| 1000                                          | 25                       | 1.57               |                                    | 100       | 100                   | 0                     |
| 1000                                          | 50                       | 3.14               |                                    | 100       | 99                    | 1                     |
| 1000                                          | 100                      | 6.28               |                                    | 100       | 100                   | 0                     |
| 1000                                          | 200                      | 12.6               |                                    | 100       | 99                    | 1                     |
| 1000                                          | 3.5                      | 0.220              | -60                                | 57        | 57                    | 0                     |
| 1000                                          | 12.5                     | 0.785              |                                    | 74        | 74                    | 0                     |
| 1000                                          | 25                       | 1.57               |                                    | 90        | 90                    | 0                     |
| 1000                                          | 50                       | 3.14               |                                    | 97        | 97                    | 0                     |
| 1000                                          | 100                      | 6.28               |                                    | 98        | 98                    | 0                     |
| 1000                                          | 200                      | 12.6               |                                    | 100       | 100                   | 0                     |
| 1000                                          | 3.5                      | 0.220              | -78                                | 9         | 9                     | 0                     |
| 1000                                          | 12.5                     | 0.785              |                                    | 14        | 14                    | 0                     |

|      |     |      |    |    |   |
|------|-----|------|----|----|---|
| 1000 | 25  | 1.57 | 38 | 38 | 0 |
| 1000 | 50  | 3.14 | 70 | 70 | 0 |
| 1000 | 100 | 6.28 | 84 | 84 | 0 |
| 1000 | 200 | 12.6 | 97 | 97 | 0 |

**2-(Diphenylmethylsilyl)biphenyl (5):** The crude product was purified by flash chromatography (hexane only) to obtain 2-(diphenylmethylsilyl)biphenyl.  $^1\text{H}$  NMR (400 MHz,  $\text{CDCl}_3$ )  $\delta$  0.13 (s, 3H), 7.04-7.07 (m, 2H), 7.13-7.18 (m, 2H), 7.22-7.47 (m, 15H) ppm;  $^{13}\text{C}$  NMR (100 MHz,  $\text{CDCl}_3$ )  $\delta$  -3.4, 126.1, 127.0, 127.6, 127.7, 129.0, 129.2, 129.4, 129.8, 134.6, 135.1, 137.6, 137.8, 143.8, 150.0 ppm; HRMS (DART)  $m/z$  calcd for  $\text{C}_{25}\text{H}_{21}\text{Si}_1$  ( $\text{M}^+ - \text{H}$ ): 349.1407, found: 349.1413.

### An integrated flow microreactor system for two sets of Br-Li exchange reaction starting from 2,2'-dibromobiphenyl

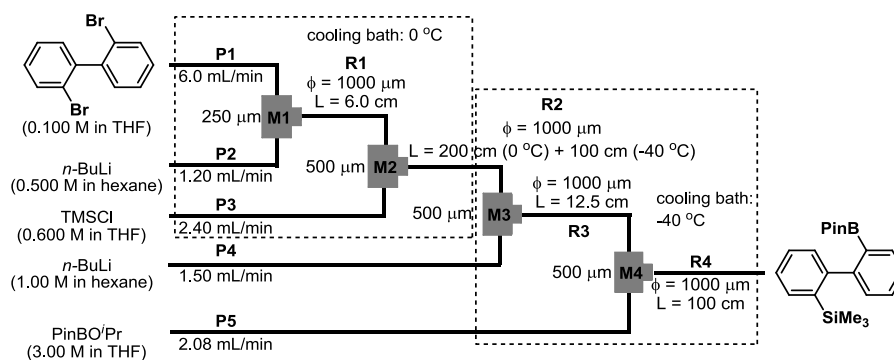

An integrated flow microreactor system consisting of four T-shaped micromixers (**M1**, **M2**, **M3**, and **M4**), four microtube reactors (**R1**, **R2**, **R3**, and **R4**) and five pre-cooling units (**P1**, **P2**, **P3**, **P4**, and **P5** (inner diameter  $\phi = 1000 \mu\text{m}$ , length  $L = 100 \text{ cm}$ )) was used. A solution of 2,2'-dibromobiphenyl (0.100 M in THF) (flow rate:  $6.00 \text{ mL min}^{-1}$ ) and a solution of *n*-BuLi (0.500 M in *n*-hexane) (flow rate:  $1.20 \text{ mL min}^{-1}$ ) were introduced to **M1** ( $\phi = 250 \mu\text{m}$ ) by syringe pumps. The resulting solution was passed through **R1** ( $\phi = 1000 \mu\text{m}$ ,  $L = 6.0 \text{ cm}$  (0.39 s)) and was mixed with a solution of TMSCl (0.600 M in THF) (flow rate:  $2.40 \text{ mL min}^{-1}$ ) in **M2** ( $\phi = 500 \mu\text{m}$ ). The resulting solution was passed through **R2** ( $\phi = 1000 \mu\text{m}$ ,  $L = 300 \text{ cm}$  (200 cm (0 °C) + 100 cm (-40 °C)) (15 s)) and was mixed with a solution of *n*-BuLi (1.00 M in *n*-hexane) (flow rate:  $1.50 \text{ mL min}^{-1}$ ) in **M3** ( $\phi = 500 \mu\text{m}$ ). The resulting solution was passed through **R3** ( $\phi = 1000 \mu\text{m}$ ,  $L = 12.5 \text{ cm}$  (0.53 s)) and was mixed with a solution of isopropyl pinacol borate (3.00 M) (flow rate:  $2.08 \text{ mL min}^{-1}$ ) in **M4** ( $\phi = 500 \mu\text{m}$ ). The resulting solution was passed through **R4** ( $\phi = 1000 \mu\text{m}$ ,  $L = 100 \text{ cm}$  (3.6 s)). After a steady state was reached, the product solution was collected for 30 s and was quenched with saturated  $\text{aqNH}_4\text{Cl}$ . The reaction mixture was analyzed by GC, which indicated the formation of 4,4,5,5-tetramethyl-2-[2'-(trimethylsilyl)[1,1'-biphenyl]-2-yl]-1,3,2-dioxaborolane in 71% yield. After purification with column chromatography (Hexane : AcOEt = 20 : 1), the spectral data of the desired product were identical.

### References

- 1) Liang, Y.; Zhang, S.; Xi, Z. *J. Am. Chem. Soc.* **2011**, 133 (24), 9204.
- 2) Nagaki, A.; Takabayashi, N.; Tomida, Y.; Yoshida, J. *Beilstein J. Org. Chem.* **2009**, 5, 16.
- 3) Matsuda, T.; Kirikae, H. *Organometallics*, **2011**, 30 (15), 3923.



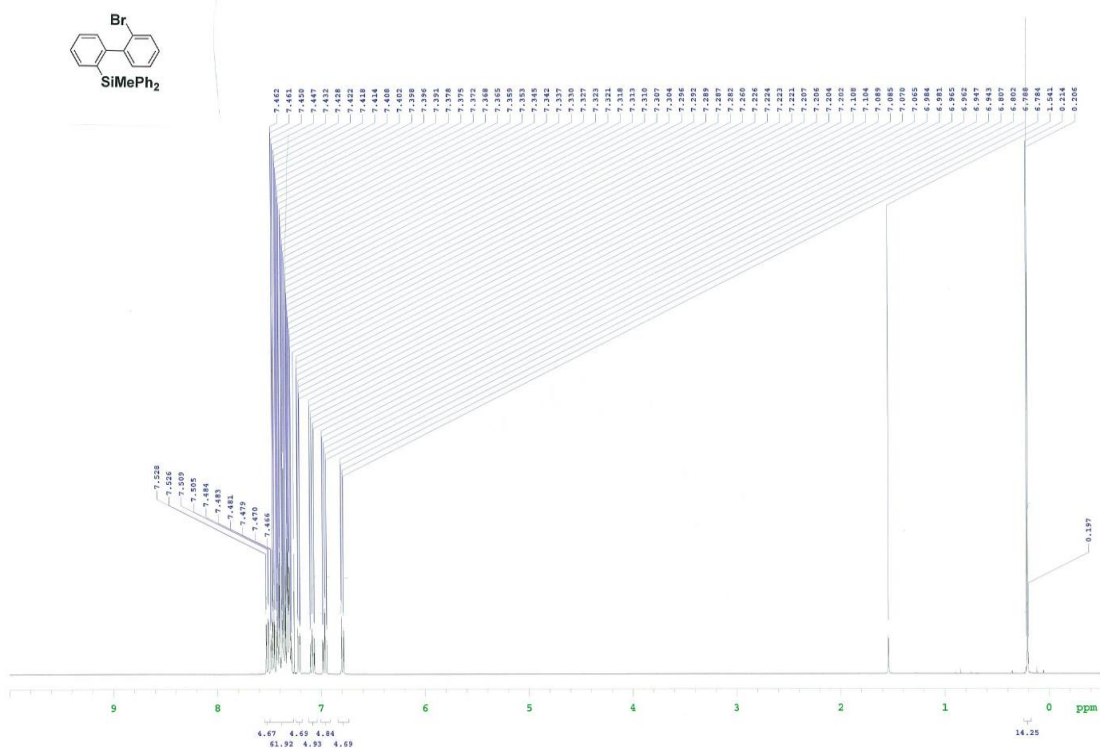

**<sup>1</sup>H NMR spectrum of 2-bromo-2'-(diphenylmethylsilyl)biphenyl**

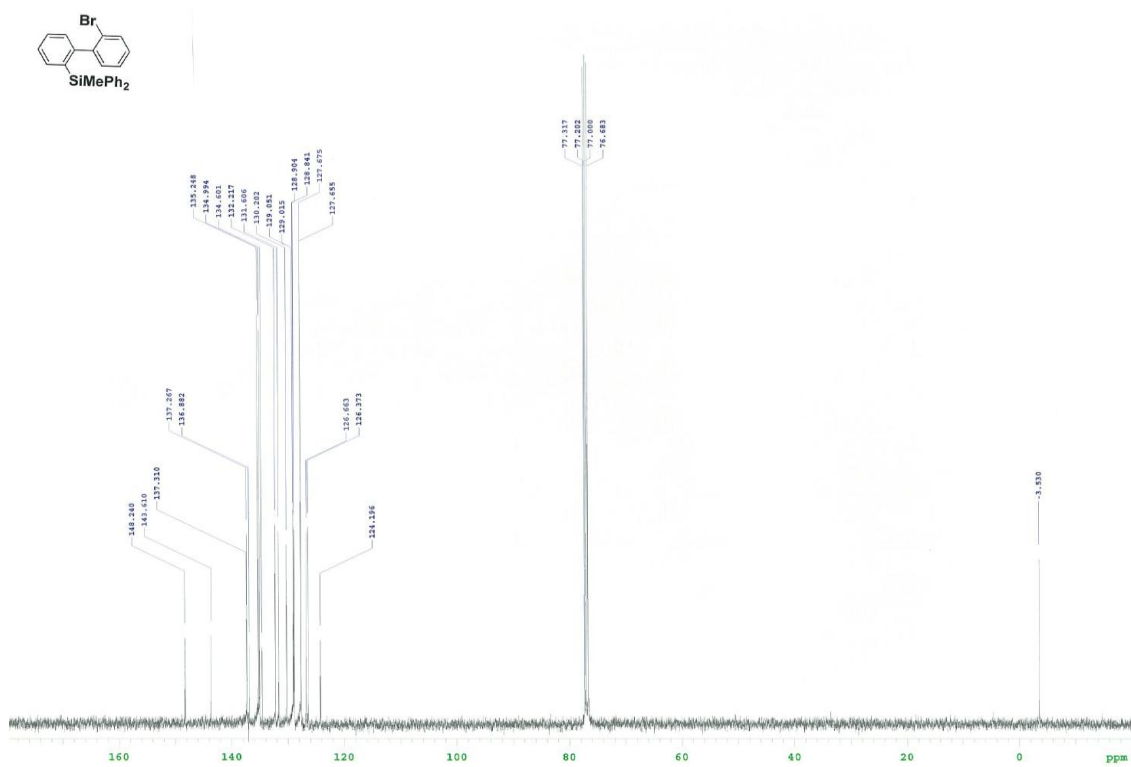

**<sup>13</sup>C NMR spectrum of 2-bromo-2'-(diphenylmethylsilyl)biphenyl**

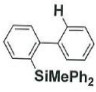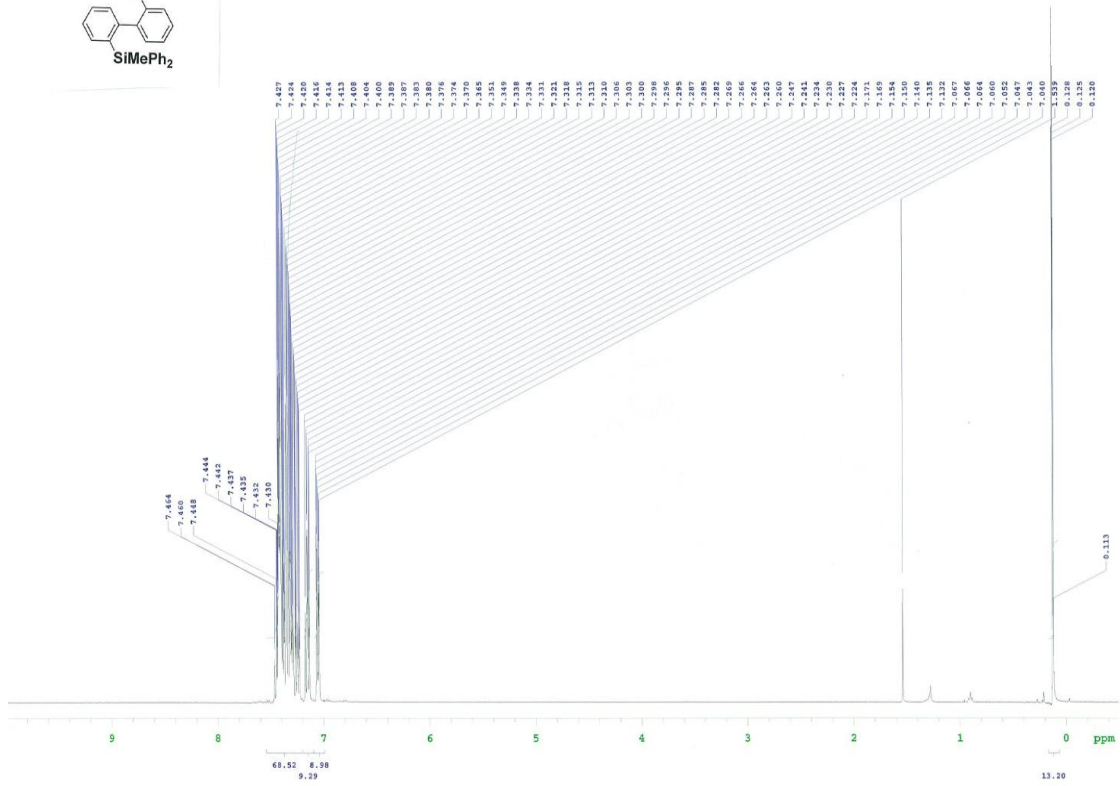

<sup>1</sup>H NMR spectrum of 2-(Diphenylmethylsilyl)biphenyl (5)

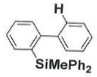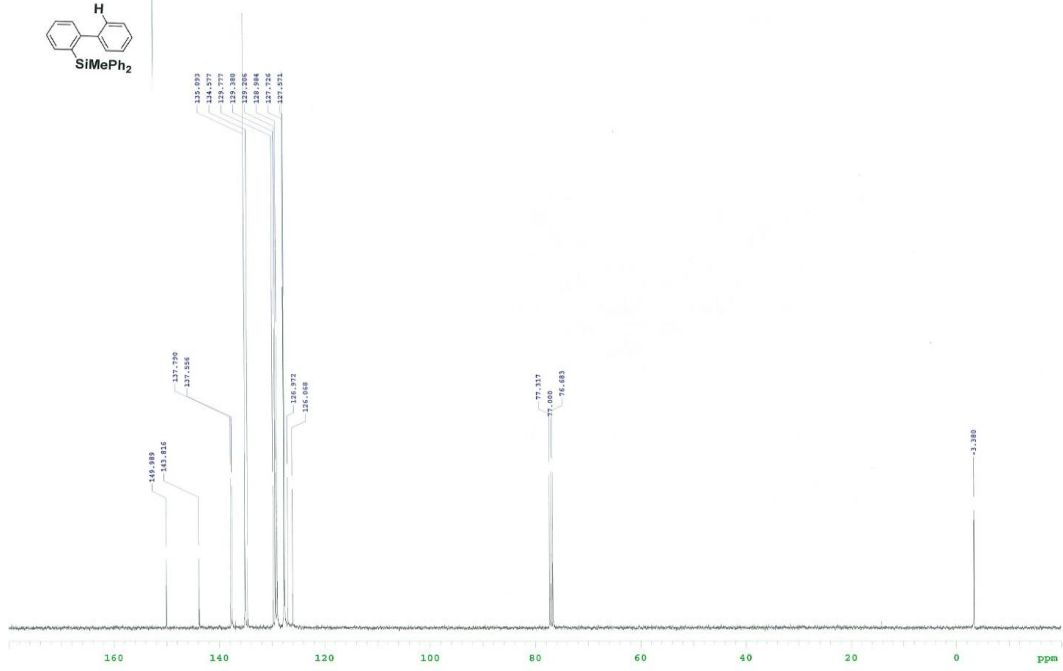

<sup>13</sup>C NMR spectrum of 2-(Diphenylmethylsilyl)biphenyl (5)

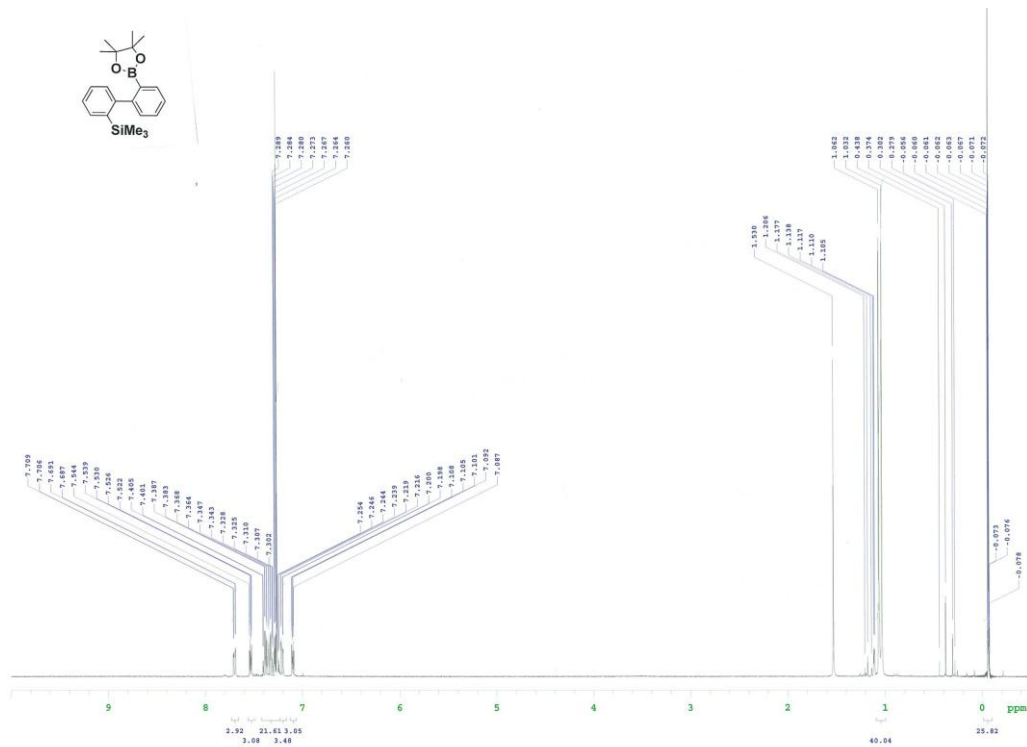

**<sup>1</sup>H NMR spectrum of 4,4,5,5-tetramethyl-2-[2'-(trimethylsilyl)[1,1'-biphenyl]-2-yl]-1,3,2-dioxaborolane**

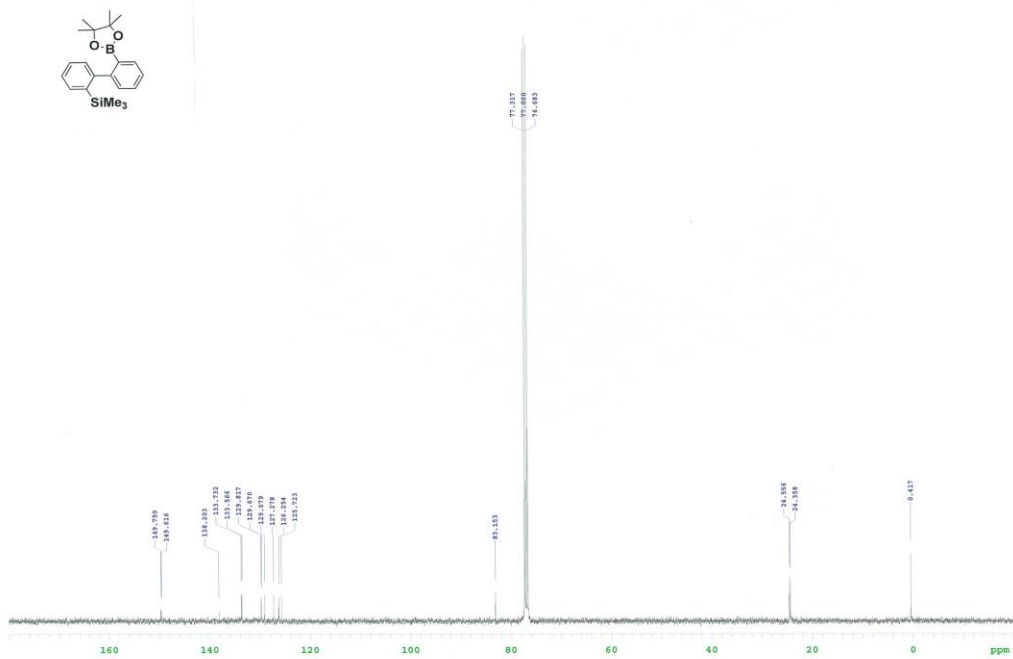

**<sup>13</sup>C NMR spectrum of 4,4,5,5-tetramethyl-2-[2'-(trimethylsilyl)[1,1'-biphenyl]-2-yl]-1,3,2-dioxaborolane**
